# Supplementary material for: HIF-1α induces glycolytic reprograming in tissue-resident alveolar macrophages to promote cell survival during acute lung injury
Source: eLife. 2022 Jul 13;11:e77457. doi: 10.7554/eLife.77457 (PMC9323005; doi:10.7554/eLife.77457)
Supplement: Figure 2—source data 1. [file elife-77457-fig2-data1.xlsx]

## Sheet: Figure 2-source data 1 (Fig 2C)
Gene	BMDM Norm 1	BMDM Norm 2	BMDM Norm 3	BMDM Norm 4	BMDM Hyp 1	BMDM Hyp 2	BMDM Hyp 3	BMDM Hyp 4	AM Norm 1	AM Norm 2	AM Norm 3	AM Norm 4	AM Hyp 1	AM Hyp 2	AM Hyp 3	AM Hyp 4
Arg1	72	45	47	67	1897	1845	1251	1682	4	5	6	9	307	385	307	475
Egln1	2428	2276	2331	1757	5568	5200	5263	5826	1307	1723	1543	1233	5518	7844	5912	7342
Egln3	352	288	277	233	3712	3537	3401	3888	0	2	0	2	5650	7416	5754	8012
Eno1	31392	28320	28194	29556	82993	79576	68974	84471	7860	8884	8112	8893	60394	67787	57340	63193
Epm2a	226	245	230	202	811	734	697	789	401	486	416	379	847	1171	991	1226
Gys1	1049	1105	952	913	5123	4769	4090	5224	641	729	616	622	4262	5447	4466	5349
Hilpda	596	528	590	591	3218	2964	2546	3058	235	280	255	229	1500	1735	1398	1609
Hk2	1662	1506	1463	1385	4959	4206	4217	5156	2358	2759	2490	2118	5328	6761	5649	6400
Ldha	45726	41538	41711	41000	97781	89058	84915	100510	15536	17448	15660	16105	78364	92324	75883	87687
Pdk1	6170	5338	5452	4417	12108	11136	11743	12872	1211	1497	1309	955	8280	10853	8794	10527
Pfkfb3	2473	2268	2131	1957	4787	4527	4240	5069	1578	1625	1519	1129	2668	3239	2743	3339
Pfkp	5762	4952	4906	4705	10184	9467	8898	10580	2739	3007	2648	2552	4633	5375	4615	5558
Pgam1	9660	8512	8608	7840	18268	16685	16677	18186	5261	6372	5407	4680	17863	23566	18587	20993
Pgk1	29164	23751	24221	25056	72842	67644	61172	75439	4234	4272	4068	4538	33407	36949	31863	38290
Pgm1	1718	1478	1555	1444	4644	4272	4020	4821	618	787	672	647	2450	2991	2417	2777
Pkm	77237	71018	70308	70114	139238	131548	118990	145074	33087	37160	33642	35838	93839	105712	89996	102852
Pygl	3376	3299	3370	2938	5558	5332	5183	6062	4638	5566	5172	4255	10913	13123	11110	13348
Slc16a3	4752	4396	4470	3998	14633	13893	13787	15447	1462	1814	1682	1533	12479	16145	11650	14799
Slc2a1	4685	4475	4343	4258	17965	16766	14908	17605	1679	1848	1775	1570	10231	12433	9936	12040
Tpi1	24056	21675	21620	22025	52872	49889	45638	56090	5849	6750	5943	6001	36951	42553	35845	40898
