# Supplementary material for: HIF-1α induces glycolytic reprograming in tissue-resident alveolar macrophages to promote cell survival during acute lung injury
Source: eLife. 2022 Jul 13;11:e77457. doi: 10.7554/eLife.77457 (PMC9323005; doi:10.7554/eLife.77457)
Supplement: Figure 5—source data 2. [file elife-77457-fig5-data2.csv]

gene	TR-AM_d0_1	TR-AM_d0_2	TR-AM_d0_3	TR-AM_d3_1	TR-AM_d3_2	TR-AM_d3_3	TR-AM_d6_1	TR-AM_d6_2	TR-AM_d6_3	Mo-AM_d3_1	Mo-AM_d3_2	Mo-AM_d6_1	Mo-AM_d6_2
Pgam1	3.3714	3.6739	3.661	4.4739	4.6314	3.9708	6.8553	7.486	6.6671	3.8689	6.6593	4.233	3.8119
Slc16a3	67.6596	67.6334	58.6927	112.3318	80.2403	98.3194	155.6986	94.8782	150.7749	339.6555	425.9088	173.0676	157.5801
Pkm	580.4544	593.6705	619.0043	661.9166	706.7616	694.8352	1000.4416	1215.7275	1147.0149	930.7323	1034.2929	838.9729	844.669
Vegfa	0.8138	0.3897	0.0581	37.8392	17.6886	19.4066	89.3389	110.3493	109.5154	304.7198	300.8624	255.9732	217.6329
Got1	26.0408	28.0553	26.7313	63.5505	45.3653	48.0412	131.2387	127.5394	123.0682	184.8414	197.103	117.4949	153.2403
Pfkl	89.0503	96.4123	78.7412	114.7574	105.7408	112.9163	187.8913	235.0052	216.5715	134.6611	196.4769	95.2416	65.8587
Hk1	31.7372	38.7987	30.741	54.7105	37.4417	48.4886	128.6611	131.5874	124.7623	269.7842	203.3639	186.9759	177.2263
Eno2	0.3488	0.1113	0.523	2.9107	1.3392	1.0067	4.0035	6.4879	3.3336	6.8139	11.1557	9.6149	9.1487
Pfkfb3	27.6684	33.0652	32.0776	91.5256	45.7559	67.6156	216.6289	237.6668	247.5025	255.5789	273.5424	369.2956	350.7579
Slc2a1	23.5414	25.8844	24.0582	87.6986	65.9555	88.8118	131.4032	115.6172	124.3797	183.3978	183.6707	199.3725	142.5669
Hk2	28.1915	30.3933	24.0001	74.4926	52.7309	59.1706	84.1836	62.217	62.0259	95.1636	90.5547	80.0634	81.0479
